# Supplementary material for: Falls and fear of falling in older adults with total joint arthroplasty: a scoping review
Source: Springer Nature journal article supplement (doi:10.1186/s12891-019-2954-9), 2019-12-01
Supplement: MOESM2 [file 17679018]

## Additional File 2

Table S1. Characteristics of included studies

| Author                                 | Study Design    | Sample Characteristics                             | Joint replaced                              | Timeframe: Pre-operative or post-operative | Recall time for falls | Number of falls                                      | Measures                                                                                                                                                                                                                                                                                                                                                                                                                                                                                                                                                                                                                                                                                                                                                                                                                                                                                                                                                                                                                                                                                                                                                                                                                                                                                                                                                                                                                                                                                                                      | Results    | Quality of Study |
|----------------------------------------|-----------------|----------------------------------------------------|---------------------------------------------|--------------------------------------------|-----------------------|------------------------------------------------------|-------------------------------------------------------------------------------------------------------------------------------------------------------------------------------------------------------------------------------------------------------------------------------------------------------------------------------------------------------------------------------------------------------------------------------------------------------------------------------------------------------------------------------------------------------------------------------------------------------------------------------------------------------------------------------------------------------------------------------------------------------------------------------------------------------------------------------------------------------------------------------------------------------------------------------------------------------------------------------------------------------------------------------------------------------------------------------------------------------------------------------------------------------------------------------------------------------------------------------------------------------------------------------------------------------------------------------------------------------------------------------------------------------------------------------------------------------------------------------------------------------------------------------|------------|------------------|
| <b>Pre-operative studies</b>           |                 |                                                    |                                             |                                            |                       |                                                      |                                                                                                                                                                                                                                                                                                                                                                                                                                                                                                                                                                                                                                                                                                                                                                                                                                                                                                                                                                                                                                                                                                                                                                                                                                                                                                                                                                                                                                                                                                                               |            |                  |
| Hill et al. (2016)<br><i>Australia</i> | Cross sectional | n=282<br>Age: 67.3 ±8.6 yrs<br>Female n =155 (55%) | Hip (n=85)<br>Knee (n=197)<br>Total (n=282) | pre-operative = 2-4 weeks                  | 12 months             | 116 (41%) had one fall or more in the past 12 months | <p><i>TKA Non-fallers</i>      <i>TKA Fallers</i>      <i>p-value</i></p> <p>Falls Efficacy Scale: International 7-28 (7: no concern)</p> <p>11.4 ± 3.8      13.5 ± 5.6      0.005</p> <p>71.2 ± 22.1      63.8 ± 20.6      0.051</p> <p>Activities- Specific Balance Confidence Scale 0-100 (0: least fearful)</p> <p>671.7 ± 280.0      807.4 ± 282.00      0.020*</p> <p>WOMAC Function, VAS Scale 0-1700 (0: no difficulty with function)</p> <p>54.9 ± 9.7      50.6 ± 13.1      0.030*</p> <p>Self-perceived quality of life (SF-36 Mental) 0-100 (0: lowest quality)</p> <p>11.1 ± 9.5      14.4 ± 11.5      0.021**</p> <p>Pain (Pain Catastrophizing Scale) 0-52 (0: least catastrophizing)</p> <p>Cardiac Depression Scale (CDS) 26 – 182 (26: least depressive mood)</p> <p>* One-way ANOVA post hoc: significant difference between multiple fallers and other groups<br/>** One-way ANOVA post hoc: significant difference between all three groups</p> <p><b>Not significant:</b> TKA patients- WOMAC pain/ stiffness/ total; SF-36 Physical Component Score; Tampa Scale for Kinesiophobia; IPEQ Incidental Activity; IPEQ planned activity / total activity were not significantly different between non-fallers and multiple fallers.</p> <p><b>Not significant:</b> THA patients - WOMAC pain/ stiffness/ function/ total; Pain Catastrophizing Scale; SF-36 Physical Component score/ Mental Component Score; Tampa Scale for Kinesiophobia; Cardiac Depression Scale; IPEQ incidental/ planned/ total</p> | Acceptable |                  |

|                                                 |                 |                                                                   |                            |                                         |          |                                                                                   |                                                                                                                                                                                                                                                                                                                                                                                                                                                                                                                                                                                                                                                                                                                                                                                                                                                                                                                                                                                                                                                                                                                                                                                                                                                                                                                                                                                                                                                                                                                                                                                                                                                                                                                                                                                                                                                                                                                                                                                                                                                                                                                                       |      |
|-------------------------------------------------|-----------------|-------------------------------------------------------------------|----------------------------|-----------------------------------------|----------|-----------------------------------------------------------------------------------|---------------------------------------------------------------------------------------------------------------------------------------------------------------------------------------------------------------------------------------------------------------------------------------------------------------------------------------------------------------------------------------------------------------------------------------------------------------------------------------------------------------------------------------------------------------------------------------------------------------------------------------------------------------------------------------------------------------------------------------------------------------------------------------------------------------------------------------------------------------------------------------------------------------------------------------------------------------------------------------------------------------------------------------------------------------------------------------------------------------------------------------------------------------------------------------------------------------------------------------------------------------------------------------------------------------------------------------------------------------------------------------------------------------------------------------------------------------------------------------------------------------------------------------------------------------------------------------------------------------------------------------------------------------------------------------------------------------------------------------------------------------------------------------------------------------------------------------------------------------------------------------------------------------------------------------------------------------------------------------------------------------------------------------------------------------------------------------------------------------------------------------|------|
| Mitchell et al. (2007)<br><i>United Kingdom</i> | Cross Sectional | n = 199<br>Age: 72 (95% CI: 71.6, 72.7) yrs<br>Female 111 (55.6%) | Hip (n=84)<br>Knee (n=115) | pre-operative time points not specified | 4 weeks  | 75 (39%) of pre-op patients fell at least once                                    | <p><i>Non fallers</i>      <i>Fallers</i>      <i>p-value</i></p> <p>WOMAC Pain*<br/>0 – 100, 0 least pain      45      33      0.0012</p> <p>WOMAC Function*<br/>0 – 100, 0 no difficulty with function      41      33      0.0001</p> <p>Self-perceived quality of life -36 *      28      20      &lt;0.05</p> <p>Physical Functioning      33      25      &lt;0.05</p> <p>Bodily Pain      17      7      &lt;0.05</p> <p>Role Physical      60      52      &lt;0.05</p> <p>General Health      48      40      &lt;0.05</p> <p>Vitality      56      36      &lt;0.05</p> <p>Role Emotional</p> <p>Timed Up and Go – mean (95% CI)      16 (14.9, 17.0)      19.8 (16.8, 22.8)      0.02</p> <p>Hypnotic/Antidepressant Medication – n (95% CI)      8/119 (7)      13/75 (17)      0.02</p> <p>Number of Comorbid Conditions – mean (95% CI)      1.9 (1.6, 2.1)      2.6 (2.2, 3.0)      0.0025</p> <p>Self-Reported Depression – n (95% CI)      14/115 (12)      17/69 (25)      0.0025</p> <p>Number of Geriatric Problems – mean (95% CI)      1.2 (0.9, 1.4)      1.8 (1.5, 2.1)      0.0016</p> <p>Self-Reported Memory Problem – n (95% CI)      11/114 (10)      17/72 (24)      0.010</p> <p>Self-Reported Balance Problem – n (95% CI)      37/114 (33)      42/72 (58)      0.0005</p> <p><b>Not significant:</b> WOMAC stiffness, SF-Social Functioning, SF-Role Emotional (p&gt;0.05), age, sex, joint being replaced, osteoporosis at any site, use of parathyroid hormone, use of vitamin D, BMI, and number of prescription medications were not statistically different between non-fallers and fallers.</p> <p><i>Adjusted OR (for sex and gender) for factors associated with falling</i>      <i>p-value</i></p> <p>Number of comorbid conditions &gt; 2      2.2 (1.03, 4.8)      &lt;0.05</p> <p>Self-reported balance problem      2.5 (1.2, 5.1)      &lt;0.05</p> <p><b>Not significant:</b> Self reported depression, Hypnotic/antidepressant medication, more than one geriatric problem, and self-reported memory problem were factors that were not significantly associated with falling.</p> | Poor |
| Pozzi et al (2015)<br>USA                       | Cross Sectional | n=31<br>Age: 65 ± 8 yrs<br>Female 31 (100%)                       | Hip (n=31)                 | Pre-operative = 2 weeks                 | 6 months | 7 (22.5%) of pre-op patients reported at least one fall within 6 months of survey | <p><i>Non-fallers (n=24)</i>      <i>Fallers (n=7)</i>      <i>t-test</i>      <i>Correlation with fall (r, p-value)</i></p> <p>Age      63 ± 8      71 ± 6      0.01      0.40, 0.03</p> <p>Timed up and go (s)      10.9 ± 3.43      17.63 ± 11.13      &gt;0.01      0.45, 0.01</p> <p>Stair climbing (s)      22.64 ± 9.07      41.4 ± 20.4      &gt;0.01      0.54, &gt;0.01</p> <p>6 minute walk test (m)      399.16 ± 86.19      264.36 ± 145.85      &gt;0.01      -0.5, &gt;0.01</p>                                                                                                                                                                                                                                                                                                                                                                                                                                                                                                                                                                                                                                                                                                                                                                                                                                                                                                                                                                                                                                                                                                                                                                                                                                                                                                                                                                                                                                                                                                                                                                                                                                        | Poor |

|                                                                                                                                                                                                     |                    |                                                  |                                                 |                                                                   |           |                                                                                                                                                                                    |                                                                                                                                                                                                                                                                                                                                                                                                                                                                                                                                                                                                                                                                   |                                                                                                                                                                                   |                                                                                                             |            |
|-----------------------------------------------------------------------------------------------------------------------------------------------------------------------------------------------------|--------------------|--------------------------------------------------|-------------------------------------------------|-------------------------------------------------------------------|-----------|------------------------------------------------------------------------------------------------------------------------------------------------------------------------------------|-------------------------------------------------------------------------------------------------------------------------------------------------------------------------------------------------------------------------------------------------------------------------------------------------------------------------------------------------------------------------------------------------------------------------------------------------------------------------------------------------------------------------------------------------------------------------------------------------------------------------------------------------------------------|-----------------------------------------------------------------------------------------------------------------------------------------------------------------------------------|-------------------------------------------------------------------------------------------------------------|------------|
|                                                                                                                                                                                                     |                    |                                                  |                                                 |                                                                   |           |                                                                                                                                                                                    | Total hip ROM, degrees<br>156.08 ±26.94    135.85 ±13.45    0.03    -0.33, 0.06<br>Knee extension on surgical side of hip, Nm/Kg<br>2.15 ± 1.13    1.33 ± 0.63    0.04    -0.32, 0.08<br>Knee extension on non-surgical side of hip, Nm/Kg<br>1.04 ± 2.19    2.08 ± 1.24    0.04    -0.31, 0.08<br><br><b>Not significant:</b> BMI; Hip Harris Score; Hip Outcome Score; low back pain on a 1-10 scale; hip pain on 1-10 scale for both surgical and non-surgical side; knee pain on 1-10 scale on surgical and non-surgical side; knee abductor strength on surgical and non-surgical side; are all not significantly different between non-fallers and fallers. |                                                                                                                                                                                   |                                                                                                             |            |
| Tsonga et al (2015)<br><br>Greece                                                                                                                                                                   | Cross Sectional    | n=68<br>Age: 73 ±5.8yrs<br><br>Female 57 (83.8%) | Knee (n=68)                                     | Pre-operative = 1 month                                           | 12 months | 43 (63.2%) had one or more falls in the past 12 months                                                                                                                             | <b>Mean ± SD</b><br>SF-36 Physical    34.5 ± 6.99<br>SF-36 Mental    36.36 ± 9.83<br>WOMAC (VAS Scale)<br>Total    822.79 ± 317.31<br>Pain    226.10 ± 85.24<br>Stiffness    56.62 ± 43.54<br>Physical function    540.07 ± 255.18<br>Timed Up and Go Performance Test (seconds)    13.05 ± 4.13<br><br><b>Not significant:</b> Gender; age; BMI; presence of pain elsewhere in the body; number chronic diseases; having a social environment; previous arthroplasty; SF-36 physical & mental component scores; WOMAC pain/ stiffness/ physical function; Timed Up and Go were not significantly different between non-fallers and fallers                       | Acceptable                                                                                                                                                                        |                                                                                                             |            |
| <b>Pre and post-operative studies</b>                                                                                                                                                               |                    |                                                  |                                                 |                                                                   |           |                                                                                                                                                                                    |                                                                                                                                                                                                                                                                                                                                                                                                                                                                                                                                                                                                                                                                   |                                                                                                                                                                                   |                                                                                                             |            |
| Levinger et al. (2011)<br><br>Australia                                                                                                                                                             | Prospective Cohort | n=62<br>Age: 66 ±7 yrs<br><br>Female n =30 (48%) | Knee (n=35)<br><br>Non-Surgical Controls (n=27) | pre-operative time not specified<br><br>post-operative = 4 months | 12 months | 17 (48%) of pre-op TKA patients fell<br><br>8 (30%) of non-surgical controls fell<br><br>*Timeframe not reported for pre-op patients<br>**Post-op prevalence of falls not measured | FES-I<br>7-28 (7: no concern)<br>11.4 ± 3.0 * <sup>+</sup><br>WOMAC Pain - VAS (range 0-500, 500 worst)<br>192.5 ± 106.0 <sup>+</sup><br>WOMAC Stiffness - VAS (range 0-200, 200 worst)<br>95.4 ± 46.7 <sup>+</sup><br>WOMAC Function - VAS (0-1,700)<br>609.0 ± 325.9 <sup>+</sup><br>WOMAC Total - VAS (0-2,400)<br>896.9 ± 430.4 <sup>+</sup><br>Assessment of Quality of Life<br>0.8 ± 0.0 <sup>+</sup><br>Incidental and Planned Activity Questionnaire: Incidental<br>38.5 ± 19.8* <sup>+</sup><br>Incidental and Planned Activity Questionnaire: Total<br>44.3 ± 20.6 * <sup>+</sup>                                                                       | <b>Pre-operative</b><br><br><b>Post-operative</b><br>9.7 ± 2.9*<br><br>171.5 ± 278.2<br>48.6 ± 37.3<br>278.6 ± 236.0<br>498.7 ± 498.5<br>0.7 ± 0.1*<br>8.3 ± 14.5*<br>12.1 ± 16.1 | <b>Non-surgical control</b><br>7.6 ± 1.2<br><br>-<br>-<br>-<br>-<br>0.8 ± 0.1<br>19.5 ± 13.9<br>25.9 ± 16.3 | Acceptable |
| <b>Not significant :</b> IPAQ planned was not significantly different between control and post-operative group.<br>* Significantly different to control<br>+Significantly different to post-surgery |                    |                                                  |                                                 |                                                                   |           |                                                                                                                                                                                    |                                                                                                                                                                                                                                                                                                                                                                                                                                                                                                                                                                                                                                                                   |                                                                                                                                                                                   |                                                                                                             |            |

|                      |                      |                                                                                                                                                                                                                                                                                                 |                                    |                                                     |           |                                                                         |                                                                                                                                                                                                                                                                                                                                                                                                                                                                                                                                                                                                                                                                                                            |                                                                                                                                                                                                                                                                                                                                                                                                        |            |
|----------------------|----------------------|-------------------------------------------------------------------------------------------------------------------------------------------------------------------------------------------------------------------------------------------------------------------------------------------------|------------------------------------|-----------------------------------------------------|-----------|-------------------------------------------------------------------------|------------------------------------------------------------------------------------------------------------------------------------------------------------------------------------------------------------------------------------------------------------------------------------------------------------------------------------------------------------------------------------------------------------------------------------------------------------------------------------------------------------------------------------------------------------------------------------------------------------------------------------------------------------------------------------------------------------|--------------------------------------------------------------------------------------------------------------------------------------------------------------------------------------------------------------------------------------------------------------------------------------------------------------------------------------------------------------------------------------------------------|------------|
| Riddle et al. (2016) | Retrospective Cohort | Cases: n=413<br>Age: 63.9 ±6.8 yrs<br>Female: 251 (60.7%)<br><br>Controls: n=4,200<br>Age: 60.8 ±9.2 yrs<br>Female: 2,446 (58.2%)<br><br>Controls were OA patients and individuals at risk of OA (54% had no OA and 49.1% had grade 2 or more) that did not undergo TKA during the study period | Knee arthroplasty patients (n=413) | pre-operative = 4 years<br>post-operative = 4 years | 12 months | 8-23% for men, and 15-23% for women fell at least once in the past year | <b>Non-TKA (OR, 95% CI)</b><br><i>1 Fall (reference group: no falls)</i><br>Age 1.00, (0.99, 1.01)<br>Male Sex 0.60 (0.49, 0.74)*<br>No Narcotic Use 0.63 (0.41, 0.97)*<br>No Prior Falls 0.74 (0.47, 1.15)*<br><br><b>Not significant (OR, 95% CI)</b><br>PASE score; depressive symptoms; repeated chair stand; no comorbidity; no knee replacement<br><br><i>2+ Falls (reference group: no falls)</i><br>Age 0.98 (0.97, 0.99)*<br>Depressive symptoms 1.05 (1.04, 1.07)*<br>No comorbidity 0.77 (0.60, 0.97)*<br>No narcotic use 0.53 (0.34, 0.82)*<br>No prior falls 0.16 (0.13, 0.21)*<br><br><b>Not significant (OR, 95% CI)</b><br>Male sex; PASE score; repeated chair stand; no knee replacement | <b>TKA (OR, 95% CI)</b><br>1.02 (1.01, 1.03)*<br>0.83 (0.67, 1.02)<br>0.41 (0.33, 0.50)<br>0.78 (0.55, 1.20)*<br><br>PASE score; depressive symptoms; repeated chair stand; no comorbidity; no knee replacement<br><br>0.99 (0.98, 1.01)*<br>1.04 (1.03, 1.05)*<br>0.80 (0.66, 1.08)<br>0.89 (0.55, 1.44)<br>0.14 (0.10, 0.18)*<br><br>Male sex; PASE score; repeated chair stand; no knee replacement | Acceptable |
|----------------------|----------------------|-------------------------------------------------------------------------------------------------------------------------------------------------------------------------------------------------------------------------------------------------------------------------------------------------|------------------------------------|-----------------------------------------------------|-----------|-------------------------------------------------------------------------|------------------------------------------------------------------------------------------------------------------------------------------------------------------------------------------------------------------------------------------------------------------------------------------------------------------------------------------------------------------------------------------------------------------------------------------------------------------------------------------------------------------------------------------------------------------------------------------------------------------------------------------------------------------------------------------------------------|--------------------------------------------------------------------------------------------------------------------------------------------------------------------------------------------------------------------------------------------------------------------------------------------------------------------------------------------------------------------------------------------------------|------------|

|                                   |                    |                                                      |             |                                                             |         |                                                     |                                                                                                                                                                                                                                                                                                                                                                                                                                                                                                                                                                                                                                                                                                                                                                                                                                                                                                                            |            |
|-----------------------------------|--------------------|------------------------------------------------------|-------------|-------------------------------------------------------------|---------|-----------------------------------------------------|----------------------------------------------------------------------------------------------------------------------------------------------------------------------------------------------------------------------------------------------------------------------------------------------------------------------------------------------------------------------------------------------------------------------------------------------------------------------------------------------------------------------------------------------------------------------------------------------------------------------------------------------------------------------------------------------------------------------------------------------------------------------------------------------------------------------------------------------------------------------------------------------------------------------------|------------|
| Swinkles et al. (2009)<br><br>UK  | Prospective Cohort | n=99<br>Age: 73.4 ± 4.9 yrs<br><br>Female: 63(64%)   | Knee (n=99) | pre-operative = 3 months<br><br>post-operative =12 months   | 1 month | Pre-op: 24 (24%) fell<br><br>Post-op: 11 (13%) fell | <p>ABC-UK (0-100, 100 Best)<br/>Fallers 53.1±26.4 64.6±18.7 66.0±23.2 61.2±30.4<br/>Non-Fallers 64.4±24.3 67.6±22.8 71.2±25.8 76.7±22.7</p> <p>ABC – UK (0-100, 100 best)<br/>Geriatric Depression Scale (0-15, 15 worst) 5.4 ± 2.6 3.4 ± 2.5<br/>WOMAC Pain (Likert) (0-20, 20 worst) 11.7 ± 2.7 10.4 ± 3.3<br/>WOMAC Stiffness (Likert) (0-8, 8 worst) 5.4 ± 1.2 4.8 ± 1.6<br/>WOMAC Function (Likert) (0-68, 68 worst) 42.7 ± 9.4 35.9 ± 11.4<br/>WOMAC Total (Likert) (0-96, 96 worst) 59.5 ± 11.8 51.0 ± 15.5<br/>Patients reporting falling 4 months prior to entry onto waitlist for TKA 12/23 4/75</p> <p><i>Not significant:(adjusted OR and 95% CI for pre-operative and post-operative patients): female gender; age; number of comorbid conditions; number of baseline medications including cardiovascular medications, anti-depressants; self-reported eye problems; self-reported hearing problems.</i></p> | High       |
| Tsonga et al (2016)<br><br>Greece | Prospective Cohort | n=68<br>Age: 73 ± 5.28 yrs<br><br>Female: 57 (83.8%) | Knee (n=68) | pre-operative = 2 weeks<br><br>post-operative = 1-12 months | 1 month | Pre-op: 43 (63%) fell<br><br>Post-op: 15 (22%) fell | <p>Fear of Falling (Yes) 56 (82.4%) 30 44.1%<br/>Fear of Falling –Activities Specific Balance Confidence Scale (0-100, 0 least confidence), mean ± SD 63.76 ± 20.14 81.49 ± 16.24</p> <p>Fear of Falling –Activities Specific Balance Confidence 79.50 ± 13.99 82.05 ± 16.90<br/>Fearful of Falling (Yes/No) 11 (73.3%) 19 (35.8%)<br/>History of Falls (Yes/No) 12 (30.2%) 30 (69.8%)</p> <p><b>Not significant:</b> Age; gender; BMI; pain elsewhere in the body; chronic diseases ; complications during surgery; social environment; presence of social environment; previous arthroplasty surgery; SF-36 Physical &amp; Mental component scores; WOMAC pain/ stiffness/ physical function; PASE physical activity questionnaire; Timed Up and Go, and Berg Balance scale were not significantly different between fallers and non-fallers at 1 year post-op.</p>                                                      | Acceptable |

|                                          |                    |                                                       |             |                             |                       |                                                                  | <i>O.R, 95%CI</i><br>(multiple logistic regression of falling status at 1 year post-op) stepwise method                                                                                                                                                                                                                                                                                                                                                                                                                                                                                                                                                                                                                                    |                                  |                                    |                         |      |
|------------------------------------------|--------------------|-------------------------------------------------------|-------------|-----------------------------|-----------------------|------------------------------------------------------------------|--------------------------------------------------------------------------------------------------------------------------------------------------------------------------------------------------------------------------------------------------------------------------------------------------------------------------------------------------------------------------------------------------------------------------------------------------------------------------------------------------------------------------------------------------------------------------------------------------------------------------------------------------------------------------------------------------------------------------------------------|----------------------------------|------------------------------------|-------------------------|------|
|                                          |                    |                                                       |             |                             |                       |                                                                  | Age                                                                                                                                                                                                                                                                                                                                                                                                                                                                                                                                                                                                                                                                                                                                        | 1.13, (0.98, 1.30)               |                                    |                         |      |
|                                          |                    |                                                       |             |                             |                       |                                                                  | Fear of Falling                                                                                                                                                                                                                                                                                                                                                                                                                                                                                                                                                                                                                                                                                                                            | 11.90 (2.20, 64.20)              |                                    |                         |      |
|                                          |                    |                                                       |             |                             |                       |                                                                  | Falling Status                                                                                                                                                                                                                                                                                                                                                                                                                                                                                                                                                                                                                                                                                                                             | 7.23 (1.28, 41.01)               |                                    |                         |      |
| Post-operative studies                   |                    |                                                       |             |                             |                       |                                                                  |                                                                                                                                                                                                                                                                                                                                                                                                                                                                                                                                                                                                                                                                                                                                            |                                  |                                    |                         |      |
| Ikutomo et al (2015)<br><br><i>Japan</i> | Cross Sectional    | n=214<br><br>Age: 66 ±8.7 yrs<br><br>Female 203 (95%) | Hip (n=214) | post-operative=1 year       | 12 months             | 77 (36%) of post-op patients fell                                | Age (yrs)                                                                                                                                                                                                                                                                                                                                                                                                                                                                                                                                                                                                                                                                                                                                  | <i>Non-Fallers</i><br>86.3 ± 8.2 | <i>Fallers</i><br>64.7 ± 8.7       | <i>p-value</i><br>0.004 | Poor |
|                                          |                    |                                                       |             |                             |                       |                                                                  | Height (cm)                                                                                                                                                                                                                                                                                                                                                                                                                                                                                                                                                                                                                                                                                                                                | 153 ± 6.2                        | 154.8 ± 5.9                        | 0.037                   |      |
|                                          |                    |                                                       |             |                             |                       |                                                                  | Medication, n (%)                                                                                                                                                                                                                                                                                                                                                                                                                                                                                                                                                                                                                                                                                                                          | 63 (81.8)                        | 69 (50.4)                          | <0.001                  |      |
|                                          |                    |                                                       |             |                             |                       |                                                                  | Less than one comorbid medical condition, n (%)                                                                                                                                                                                                                                                                                                                                                                                                                                                                                                                                                                                                                                                                                            | 30 (39)                          | 73 (53.3)                          | 0.044                   |      |
|                                          |                    |                                                       |             |                             |                       |                                                                  | Post-operative duration, years (interquartile range)                                                                                                                                                                                                                                                                                                                                                                                                                                                                                                                                                                                                                                                                                       | 4 (2-7)                          | 5 (2-8)                            | 0.023                   |      |
|                                          |                    |                                                       |             |                             |                       |                                                                  | Total Oxford Hip Score                                                                                                                                                                                                                                                                                                                                                                                                                                                                                                                                                                                                                                                                                                                     | 16 (14-19)                       | 14 (12-17)                         | <0.001                  |      |
|                                          |                    |                                                       |             |                             |                       |                                                                  | Use of a walking aid, n (%)                                                                                                                                                                                                                                                                                                                                                                                                                                                                                                                                                                                                                                                                                                                | 27 (35.1)                        | 25 (18.2)                          | 0.006                   |      |
|                                          |                    |                                                       |             |                             |                       |                                                                  | Walking capacity –“can you walk for more than 60 minutes without stopping?” n (%)                                                                                                                                                                                                                                                                                                                                                                                                                                                                                                                                                                                                                                                          | 32 (41.6)                        | 88 (64.2)                          | 0.001                   |      |
|                                          |                    |                                                       |             |                             |                       |                                                                  | <b>Not significant:</b> Sex; body weight; BMI; THA side were not different between non-fallers and fallers.                                                                                                                                                                                                                                                                                                                                                                                                                                                                                                                                                                                                                                |                                  |                                    |                         |      |
|                                          |                    |                                                       |             |                             |                       |                                                                  | <i>Adjusted OR (95%CI) (for sex and gender) for factors associated with falling</i> <i>p-value</i>                                                                                                                                                                                                                                                                                                                                                                                                                                                                                                                                                                                                                                         |                                  |                                    |                         |      |
|                                          |                    |                                                       |             |                             |                       |                                                                  | Medications                                                                                                                                                                                                                                                                                                                                                                                                                                                                                                                                                                                                                                                                                                                                | 4.09 (1.90, 8.80)                |                                    | <0.001                  |      |
|                                          |                    |                                                       |             |                             |                       |                                                                  | Post Operative Duration, years (IQR)                                                                                                                                                                                                                                                                                                                                                                                                                                                                                                                                                                                                                                                                                                       | 0.89 (0.81, 0.98)                |                                    | 0.014                   |      |
| Matsumoto (2012)<br><br><i>Japan</i>     | Prospective Cohort | n=74<br><br>Age: 75 ± 6 yrs<br><br>Female: 57 (88%)   | Knee (n=70) | post-operative =6-11 months | 1 month, for 6 months | 23 (32.9%) fell once or more during a 6-month observation period | Modified Falls Efficacy Scale (M-FES)                                                                                                                                                                                                                                                                                                                                                                                                                                                                                                                                                                                                                                                                                                      | <i>Fallers</i><br>122.2 ± 27.1   | <i>Non-Fallers</i><br>123.3 ± 23.3 | <i>p-value</i><br>0.874 | High |
|                                          |                    |                                                       |             |                             |                       |                                                                  | Post operative flexion                                                                                                                                                                                                                                                                                                                                                                                                                                                                                                                                                                                                                                                                                                                     | 10.2 ± 16.1                      | 119.5 ± 14.1                       | 0.016                   |      |
|                                          |                    |                                                       |             |                             |                       |                                                                  | Post operative flexion and extension                                                                                                                                                                                                                                                                                                                                                                                                                                                                                                                                                                                                                                                                                                       | 100.6 ± 18.4                     | 109.7 ± 15.9                       | 0.037                   |      |
|                                          |                    |                                                       |             |                             |                       |                                                                  | ROM of the ankle (°) – plantar flexion                                                                                                                                                                                                                                                                                                                                                                                                                                                                                                                                                                                                                                                                                                     | 55.2 ± 6.1                       | 59.1 ± 6.1                         | 0.014                   |      |
|                                          |                    |                                                       |             |                             |                       |                                                                  | <b>Not significant:</b> Age; gender; BMI; TKA side; diagnosis of OA or RA; mean time since surgery; prior hip surgery; total number of prescribed medications; hearing problems; eye problems; cardiac disease; diabetes; hypertension; ambulation; pre-operative knee flexion; pre-operative knee extension; pre-operative range of flexion and extension; post operative extension; ankle dorsiflexion; joint instability; knee extensor strength; hallux valgus; limited ankle mobility; kyphosis; one-leg stand; 10 minute walking speed; step length; JKOM total score; pain; limitation of activity; restriction of participation; and Geriatric Depression Scale; were not statistically different between fallers and non-fallers. |                                  |                                    |                         |      |

|                                             |                      |                                                |                             |                               |           |                                                                                                                  |                                                                                                                                                                                                                                                                                                                                                                                                                                                                                                                                                                                                                                                                                                                                                                                                                                                                                                                                                                                                                                                                                                                                                                                |            |
|---------------------------------------------|----------------------|------------------------------------------------|-----------------------------|-------------------------------|-----------|------------------------------------------------------------------------------------------------------------------|--------------------------------------------------------------------------------------------------------------------------------------------------------------------------------------------------------------------------------------------------------------------------------------------------------------------------------------------------------------------------------------------------------------------------------------------------------------------------------------------------------------------------------------------------------------------------------------------------------------------------------------------------------------------------------------------------------------------------------------------------------------------------------------------------------------------------------------------------------------------------------------------------------------------------------------------------------------------------------------------------------------------------------------------------------------------------------------------------------------------------------------------------------------------------------|------------|
|                                             |                      |                                                |                             |                               |           |                                                                                                                  | <p>Knee flexion (post op) (10 degree groups, 80-140) <b>OR (95% CI)</b> 0.277 (0.088-0.869) <b>p-value</b> 0.028</p> <p>Knee flexion and extension (post op (10 degree groups, 60-135) 2.308 (0.847-6.289) 0.102</p> <p>Ankle plantar flexion (5 degree groups, 40-70) 0.594 (0.374-0.945) 0.028</p>                                                                                                                                                                                                                                                                                                                                                                                                                                                                                                                                                                                                                                                                                                                                                                                                                                                                           |            |
| Soison et al (2014)<br><i>Thailand</i>      | Cross Sectional      | n=54<br>Age: 67 ±8 yrs<br>Female 46 (85%)      | Knee (n=54)                 | post-operative= 7-73 months   | 12 months | 23 (42%) of post-op patients fell                                                                                | <p><b>Non-Fallers</b>                      <b>Fallers</b>                      <b>p-value</b></p> <p>Height (cm)                      156.06 ± 7.29                      154.26 ± 4.22                      &lt;0.005</p> <p>Limited Knee Joint Motion (case)                      2                      7                      &lt;0.05</p> <p><b>Not significant:</b> Age, weight, BMI, time after surgery, VAS, WOMAC pain, stiffness, function, total, satisfaction score (maximum score 10), vision problems</p> <p><b>Coefficient of association between risk factor and falls</b>                      <b>Standard Error</b>                      <b>p value</b></p> <p>WOMAC Pain                      0.048                      0.021                      &lt;0.05</p> <p>WOMAC Stiffness                      0.141                      0.049                      &lt;0.025</p> <p>Limit Knee Joint Motion (flexion &lt;120° and/or joint was not able to fully extend 0°)                      0.594                      0.227                      &lt;0.025</p> <p><b>Not significant:</b> Sex; vision problems; BMI; VAS; WOMAC function/ total score.</p> | Poor       |
| Smith et al (2014)<br><i>United Kingdom</i> | Retrospective Cohort | n=269<br>Age: 67 ± 9 yrs<br>Female 112 (41.6%) | Hip (n=104)<br>Knee (n=165) | post-operative = 12-72 months | 12 months | 26 (25%) of post-op THA patients fell at least once<br><br>43 (26.1%) of post-op TKA patients fell at least once | <p><b>Falls in THA patients</b>                      <b>Falls in TKA patients</b></p> <p>Bisphosphonate use (OR, 95% CI: p value)                      1.28 (1.03, 1.58)                      1.23 (1.03, 1.58) 0.03</p> <p>Knee OA in the past (OR, 95% CI: p value)                      1.51 (1.06, 2.04)                      -</p> <p><b>Not significant:</b> Age; gender; marital status; employment; diagnosis of hip OA; race                      Age; gender; marital status; employment; previous hip arthroplasty; diagnosis of hip OA; diagnosis of knee OA; race</p>                                                                                                                                                                                                                                                                                                                                                                                                                                                                                                                                                                                             | Acceptable |
